# Supplementary material
Source: PubMed Central journal article supplement (PMC6590078)
Supplement: NIHMS1028508-supplement-Table_3S.pdf [file NIHMS1028508-supplement-Table_3S.pdf]

Table S3. Complete list of adverse events and actions taken

| Subject | Adverse Event                     | Notification |         | Severity:   |                                                          |         | Event Type |          | Significance |                            |                                      | Relationship to Study Procedure |               |                        | Relationship to Study Drug |               |                        | Action Taken      |      |            |           | Outcome         |                    |           |          |         | Comments |       |         |  |  |                                                                                 |                                                                                                                                     |
|---------|-----------------------------------|--------------|---------|-------------|----------------------------------------------------------|---------|------------|----------|--------------|----------------------------|--------------------------------------|---------------------------------|---------------|------------------------|----------------------------|---------------|------------------------|-------------------|------|------------|-----------|-----------------|--------------------|-----------|----------|---------|----------|-------|---------|--|--|---------------------------------------------------------------------------------|-------------------------------------------------------------------------------------------------------------------------------------|
|         |                                   | FDA          | UHC IRB | Non-Serious | Event changed risk/benefit ratio/ protocol/ consent form | Serious | Fatal      | Expected | Unexpected   | Not Clinically Significant | Significant but not life-threatening | Life-threatening or death       | Study-Related | Possibly study-related | Not study-related          | Study-Related | Possibly study-related | Not study-related | None | Medication | Procedure | Hospitalization | Discontinued Study | Recovered | Improved | Ongoing |          | Death | Unknown |  |  |                                                                                 |                                                                                                                                     |
| 003     | Sore Throat                       | X            | X       | X           |                                                          |         |            | X        | X            |                            |                                      | X                               |               |                        | X                          |               |                        | X                 |      |            |           |                 | X                  |           |          |         |          |       |         |  |  |                                                                                 |                                                                                                                                     |
| 004     | Burning Sensation Right Thumb     | X            | X       | X           |                                                          |         |            | X        | X            |                            |                                      | X                               |               |                        |                            | X             |                        | X                 |      |            |           |                 | X                  |           |          |         |          |       |         |  |  |                                                                                 |                                                                                                                                     |
| 005     | Dizziness                         | X            | X       | X           |                                                          |         |            |          |              | X                          |                                      | X                               |               |                        |                            | X             |                        |                   |      |            |           | X               | X                  |           |          |         |          |       |         |  |  |                                                                                 |                                                                                                                                     |
| 006     | Vagal Response to RHC             | X            | X       |             | X                                                        |         |            | X        |              | X                          |                                      | X                               |               |                        |                            | X             |                        |                   |      |            |           | X               | X                  |           |          |         |          |       |         |  |  |                                                                                 |                                                                                                                                     |
| 007     | Anxiety                           | X            | X       | X           |                                                          |         |            | X        |              | X                          |                                      | X                               |               |                        |                            | X             |                        |                   | X    |            |           |                 | X                  |           |          |         |          |       |         |  |  | Occurred during catheterization<br>Given Versed 0.25 mg iv                      |                                                                                                                                     |
| 007     | Nausea                            | X            | X       | X           |                                                          |         |            | X        |              | X                          |                                      | X                               |               |                        |                            | X             |                        |                   | X    |            |           |                 | X                  |           |          |         |          |       |         |  |  | Occurred during 1 ppm ENO dose<br>Given Zofran 4 mg iv                          |                                                                                                                                     |
| 007     | Vagal Response to RHC             | X            | X       |             | X                                                        |         |            | X        |              | X                          |                                      | X                               |               |                        |                            | X             | X                      |                   |      |            |           |                 | X                  |           |          |         |          |       |         |  |  |                                                                                 |                                                                                                                                     |
| 008     | Anxiety                           | X            | X       | X           |                                                          |         |            | X        |              | X                          |                                      | X                               |               |                        |                            | X             |                        |                   | X    |            |           |                 | X                  |           |          |         |          |       |         |  |  | Occurred during catheterization<br>Given Versed 0.5 mg iv x 2 (20 min apart)    |                                                                                                                                     |
| 008     | Catheter site insertion pain      | X            | X       | X           |                                                          |         |            | X        |              | X                          |                                      | X                               |               |                        |                            | X             |                        |                   | X    |            |           |                 | X                  |           |          |         |          |       |         |  |  | Occurred during catheterization<br>Given fentanyl 0.25 mg iv x 2 (20 min apart) |                                                                                                                                     |
| 008     | Headache                          | X            | X       | X           |                                                          |         |            | X        |              | X                          |                                      | X                               |               |                        |                            | X             |                        | X                 |      |            |           |                 | X                  |           |          |         |          |       |         |  |  |                                                                                 |                                                                                                                                     |
| 010     | Nausea                            | X            | X       | X           |                                                          |         |            | X        |              | X                          |                                      | X                               |               |                        |                            | X             |                        |                   | X    |            |           |                 | X                  |           |          |         |          |       |         |  |  | Occurred during 5 ppm ENO dose<br>Given Zolfran 4 mg iv                         |                                                                                                                                     |
| 010     | Pain in chest r/t catheter        | X            | X       | X           |                                                          |         |            | X        |              | X                          |                                      | X                               |               |                        |                            | X             | X                      |                   |      |            |           |                 | X                  |           |          |         |          |       |         |  |  |                                                                                 |                                                                                                                                     |
| 011     | Radial artery catheter thrombosis | X            | X       |             | X                                                        |         |            | X        |              | X                          |                                      | X                               |               |                        |                            | X             |                        |                   |      |            |           | X               | X                  |           |          |         |          |       |         |  |  |                                                                                 |                                                                                                                                     |
| 012     | Vagal Response                    |              | X       | X           |                                                          |         |            | X        |              | X                          |                                      | X                               |               |                        |                            | X             |                        |                   |      | X          |           |                 | X                  |           |          |         |          |       |         |  |  |                                                                                 | Symptoms appeared after catheterization but prior to any experimental manipulation. Resolved rapidly with rest of study uneventful. |
| 012     | Nausea                            |              | X       | X           |                                                          |         |            | X        |              | X                          |                                      | X                               |               |                        |                            | X             |                        |                   |      | X          |           |                 | X                  |           |          |         |          |       |         |  |  |                                                                                 | Supportive Care and IV fluids provided. Resolved rapidly with rest of study uneventful.                                             |
| 012     | Vomiting                          |              | X       | X           |                                                          |         |            | X        |              | X                          |                                      | X                               |               |                        |                            | X             |                        |                   |      | X          |           |                 | X                  |           |          |         |          |       |         |  |  |                                                                                 | Supportive Care and IV fluids provided. Resolved rapidly with rest of study uneventful.                                             |
